# Supplementary material for: A study on the effects of mixed organic cations on the structure and properties in lead halide perovskites
Source: Royal Society of Chemistry journal article supplement (doi:10.1039/c9cp06182g), 2020-01-01
Supplement: c9cp06182g1.pdf [file c9cp06182g1.pdf]

## Supporting Information for

### A Study on the Effects of Mixed Organic Cations on the Structure and Properties in Lead Halide Perovskite

**Figure S1.** Powder XRD patterns of the perovskite crystals (a) MAPbI<sub>3</sub>; (b) NH<sub>4</sub>@MAPbI<sub>3</sub>; (c) EA@MAPbI<sub>3</sub>; (d) FA@MAPbI<sub>3</sub>

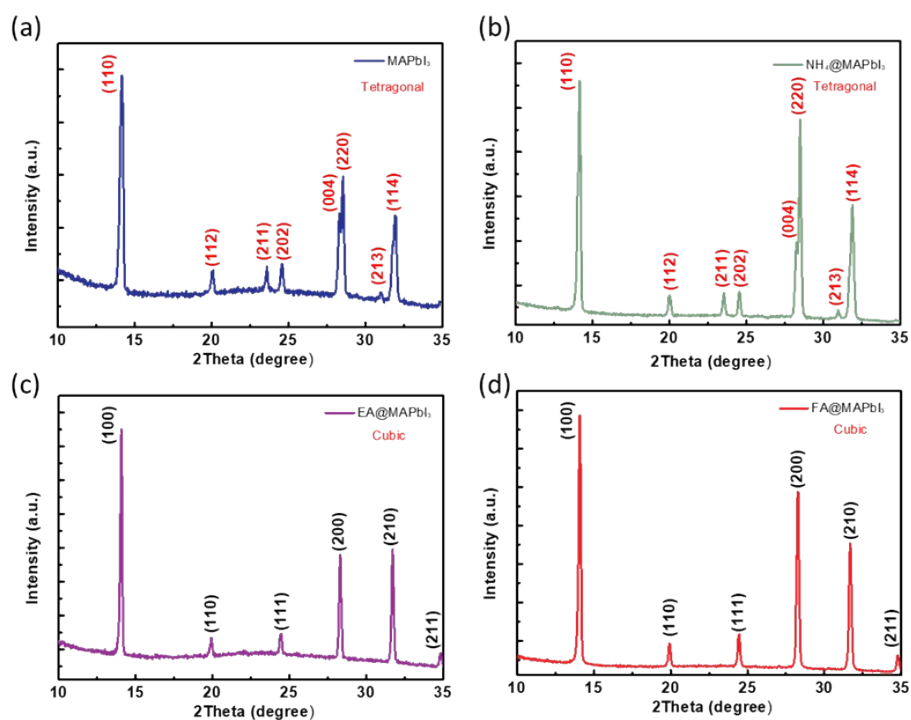

**SFigure 2.** <sup>1</sup>H NMR spectra of the samples, (a) EA@MAPbI<sub>3</sub>; (b) FA@MAPbI<sub>3</sub>; (c) MAPbI<sub>3</sub>.

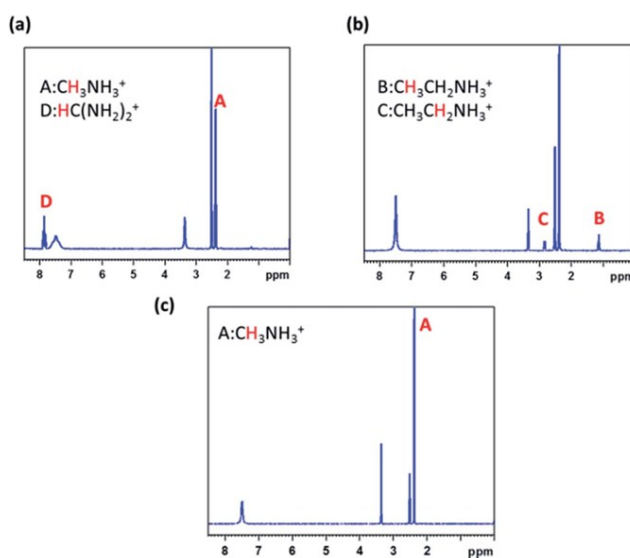

**SFigure 3.** Rietveld refinements output plot using MAUD of samples (a) MAPbI<sub>3</sub>; (b) NH<sub>4</sub>@MAPbI<sub>3</sub>; (c) EA@MAPbI<sub>3</sub>; (d) FA@MAPbI<sub>3</sub>.

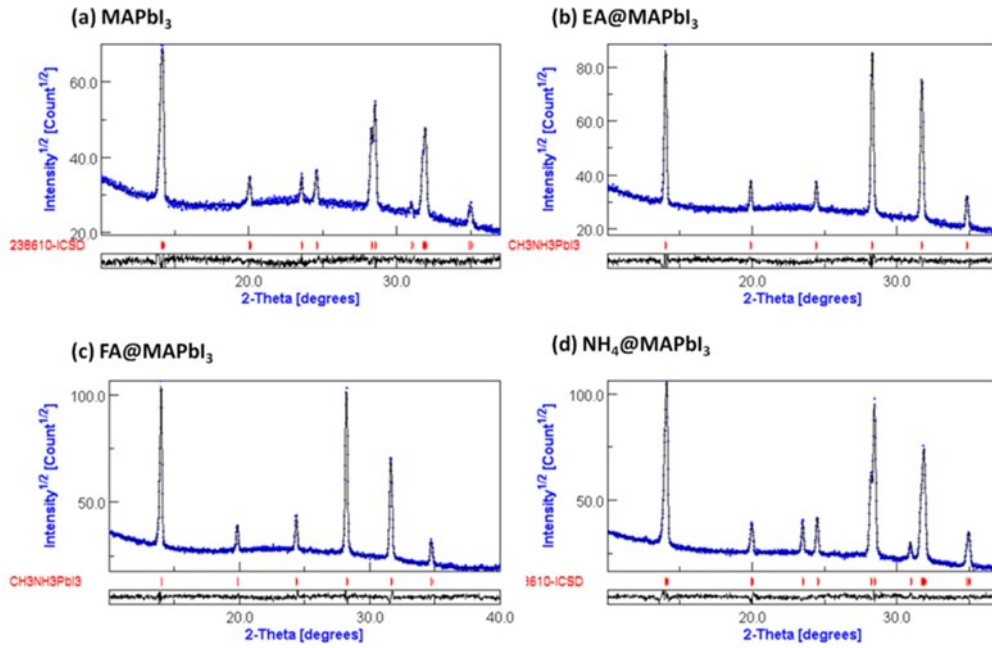

**SFigure 4.** Structure diagram of (a) NH<sub>4</sub>@MAPbI<sub>3</sub>; (b) MAPbI<sub>3</sub>; and (c)EA@MAPbI<sub>3</sub> crystals.

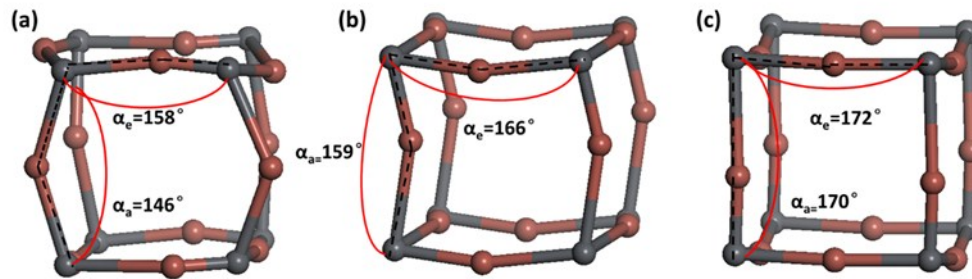

**Table1.** Fitting from Rietveld refinements with XRD data for the four samples determined by MAUD.

| Parameter               | MAPbI <sub>3</sub> | NH <sub>4</sub> @MAPbI <sub>3</sub> | EA@MAPbI <sub>3</sub> | FA@MAPbI <sub>3</sub> |
|-------------------------|--------------------|-------------------------------------|-----------------------|-----------------------|
| <b>Symmetry</b>         | Tetragonal         | Tetragonal                          | Cubic                 | Cubic                 |
| <b>Space group</b>      | I4/mcm             | I4/mcm                              | Pm-3m                 | Pm-3m                 |
| <b>a (Å)</b>            | 8.931              | 8.879                               | 6.308                 | 6.328                 |
| <b>b (Å)</b>            | 8.931              | 8.879                               | 6.308                 | 6.328                 |
| <b>c (Å)</b>            | 13.032             | 12.664                              | 6.308                 | 6.328                 |
| <b>sig</b>              | 1.19               | 1.57                                | 1.64                  | 1.44                  |
| <b>R<sub>w</sub>(%)</b> | 4.04               | 4.56                                | 5.43                  | 4.91                  |
| <b>R<sub>p</sub>(%)</b> | 3.39               | 2.28                                | 3.91                  | 3.43                  |
